# Supplementary material for: Receptor modelling of both particle composition and size distribution from a background site in London, UK – the two step approach
Source: Copernicus journal article supplement (doi:10.5194/acp-2018-784), 2018-08-30
Supplement: Supplementary file 1 [file acp-2018-784-supplement.pdf]

1  
2  
3  
4  
5  
6  
7  
8  
9  
10  
11

## **SUPPLEMENTARY INFORMATION**

### **RECEPTOR MODELLING OF BOTH PARTICLE COMPOSITION AND SIZE DISTRIBUTION FROM A BACKGROUND SITE IN LONDON, UK – THE TWO STEP APPROACH**

**David C.S. Beddows and Roy M. Harrison**

12

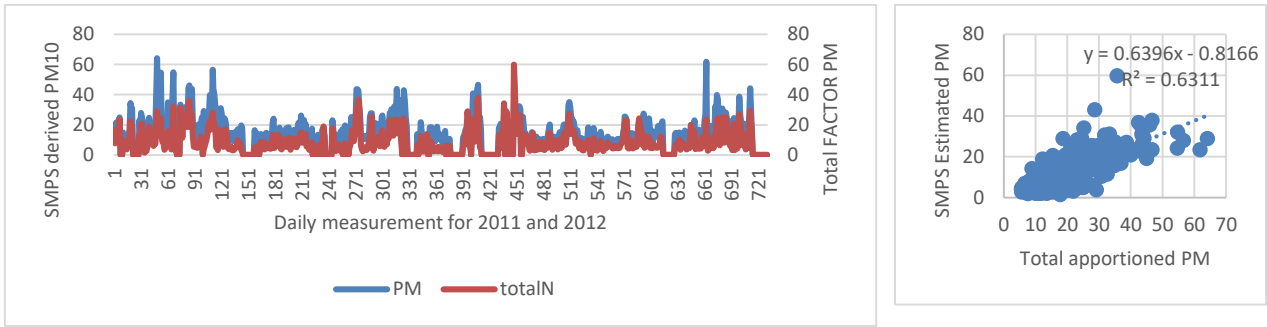

**Figure S1.** Plot of total apportioned PM<sub>10</sub> mass against PM<sub>0.6</sub> mass estimated using the NSD data.

13  
14  
15

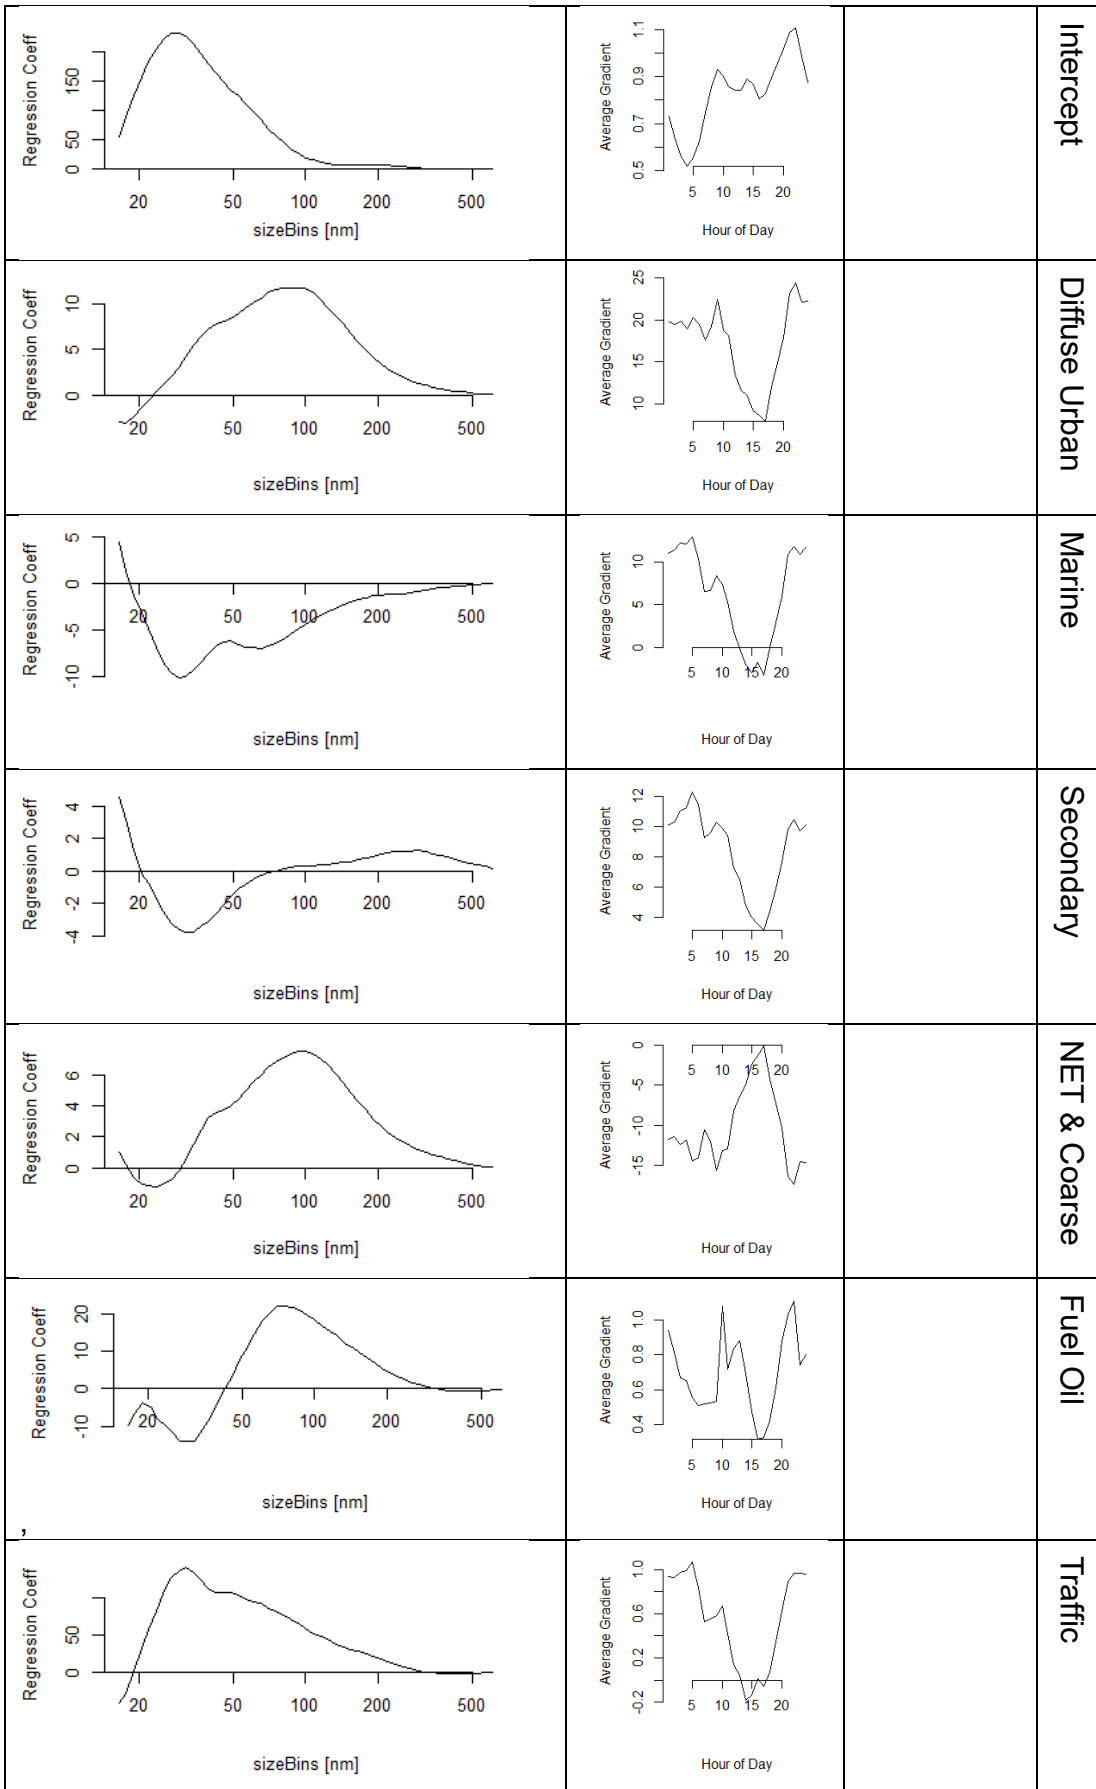

17 **Figure S2.** Regression of PN size bins against PM<sub>10</sub> G scores.

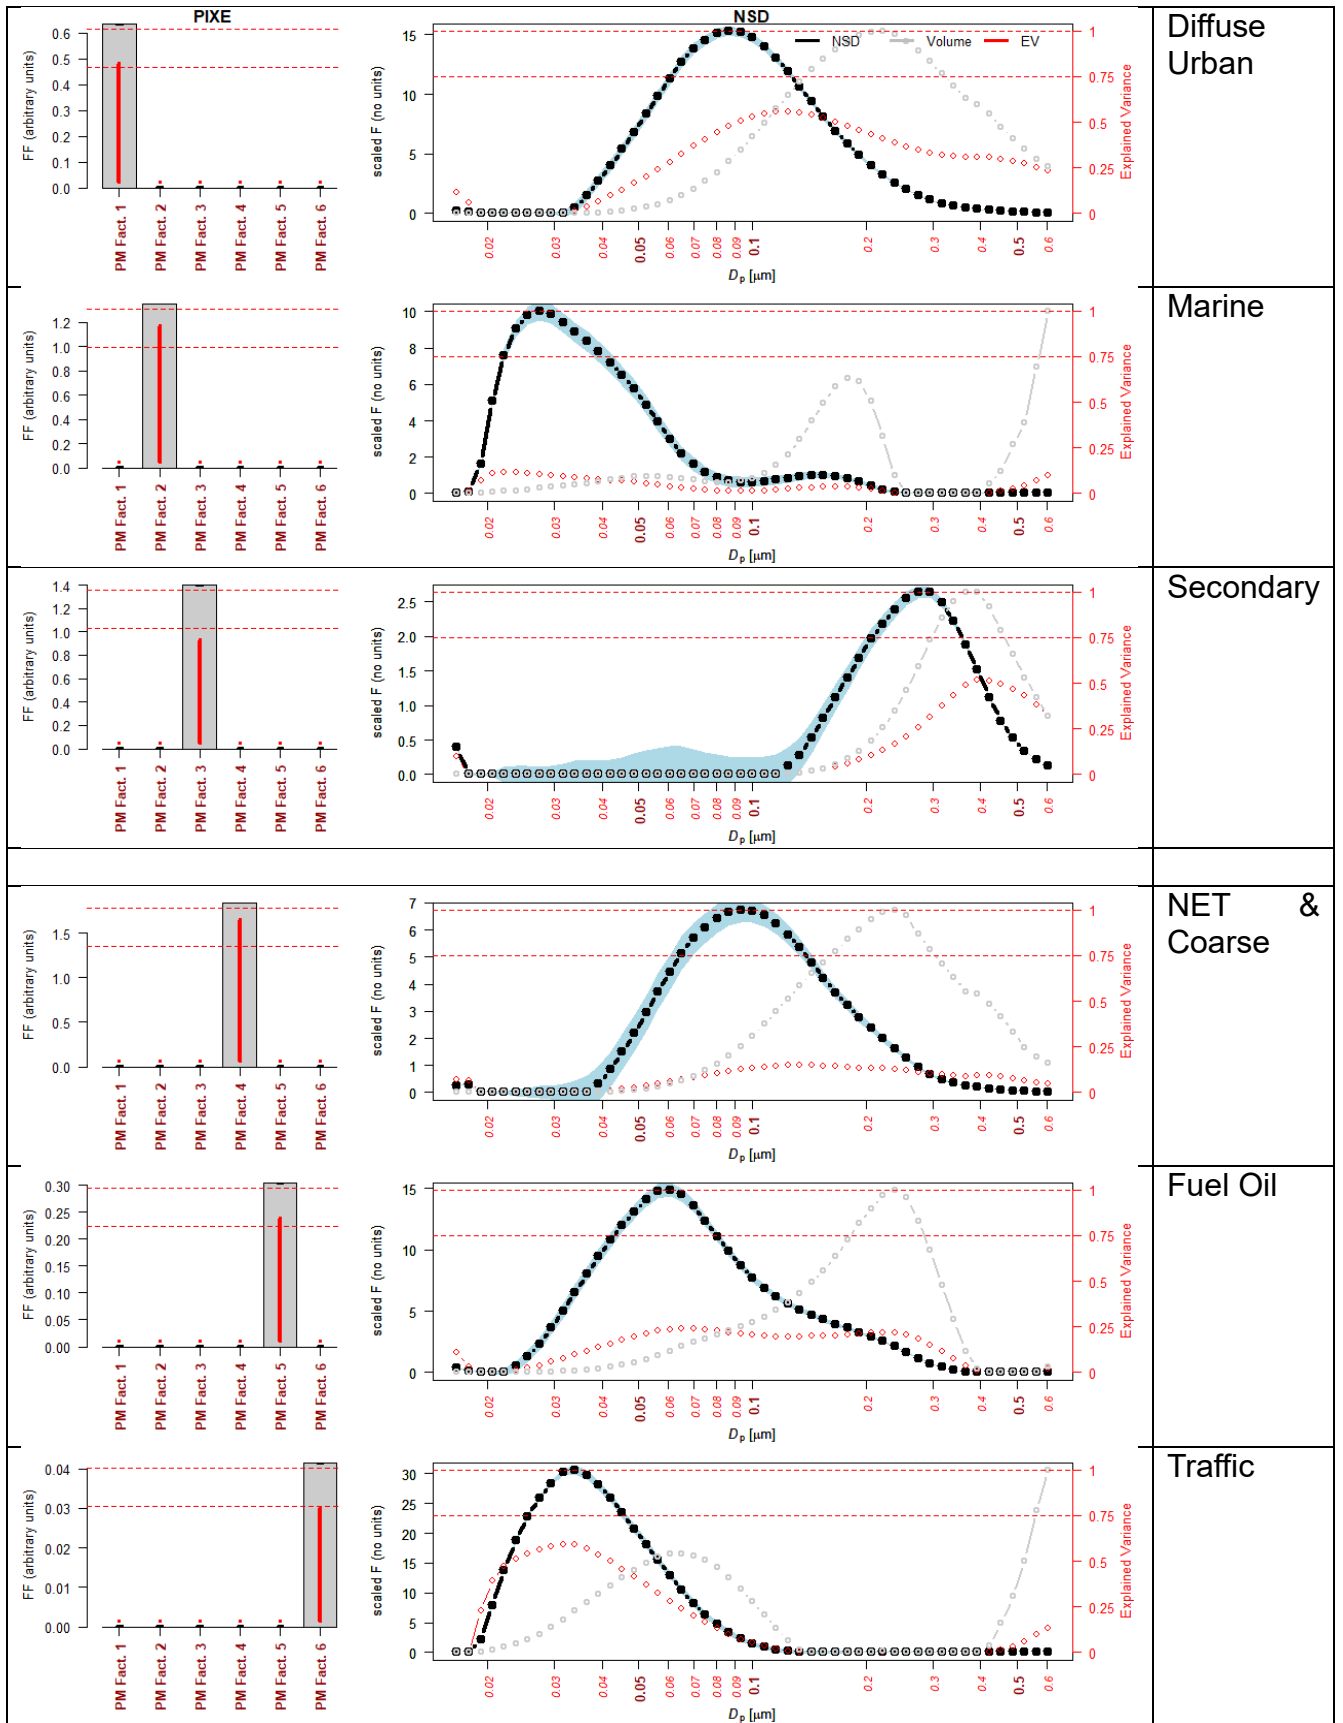

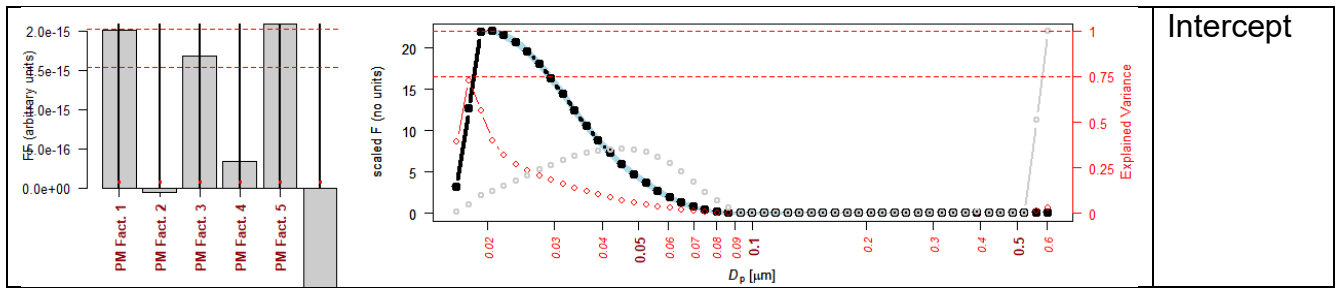

19  
20  
21  
22  
23  
24  
25  
26  
27  
28  
29  
30  
31  
32  
33  
34  
35  
36  
37  
38  
39  
40  
41  
42  
43  
44  
45  
46  
47  
48  
49  
50  
51  
52  
53  
54  
55  
56  
57  
58  
59

**Figure S3.** Second stage PMF result. 7 factors. PM10 G score driven PMF with quadruple NSD uncertainties. Also Fkey applied to G score part of F factors to pull off-diagonal elements to zero.

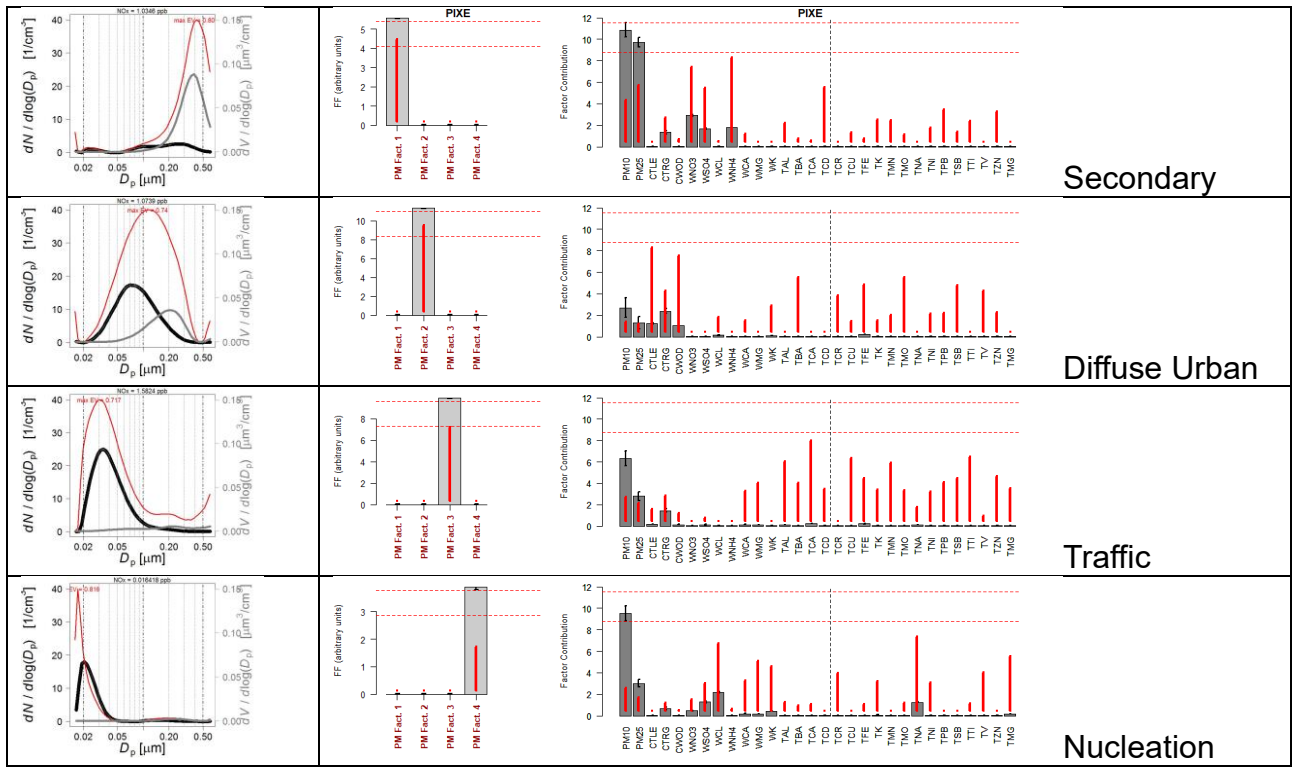

60

61

**Figure S4.** PMF-PMF analysis of NSD data followed by PM<sub>10</sub>.
